# Supplementary material for: Effect of interfacial structure on bioinert properties of poly(2-methoxyethyl acrylate)/poly(methyl methacrylate) blend films in water
Source: Royal Society of Chemistry journal article supplement (doi:10.1039/c5cp01972a), 2015-01-01
Supplement: c5cp01972a1.pdf [file c5cp01972a1.pdf]

Electronic Supplementary Information (ESI)

# **Effect of interfacial structure on bioinert property of poly(2-methoxyethyl acrylate)/poly(methyl methacrylate) blend films in water**

T. Hirata,<sup>a</sup> H. Matsuno,<sup>\*a</sup> D. Kawaguchi,<sup>b</sup> N. L. Yamada,<sup>c</sup> M. Tanaka<sup>†d</sup> and K. Tanaka<sup>\*a,e</sup>

<sup>a</sup> Department of Applied Chemistry, Kyushu University, Fukuoka 819-0395, Japan

<sup>b</sup> Education Center for Global Leaders in Molecular Systems for Devices, Kyushu University, Fukuoka 819-0395, Japan

<sup>c</sup> Neutron Science Laboratory, High Energy Accelerator Research Organization, Ibaraki 305-0801, Japan

<sup>d</sup> Department of Biochemical Engineering, Yamagata University, Yamagata 992-8510, Japan

<sup>e</sup> International Institute for Carbon-Neutral Energy Research (WPI-I2CNER), Kyushu University, Fukuoka 819-0395, Japan

## **\*Authors for correspondence:**

Hisao Matsuno

[h-matsuno@cstf.kyushu-u.ac.jp](mailto:h-matsuno@cstf.kyushu-u.ac.jp)

Keiji Tanaka

[k-tanaka@cstf.kyushu-u.ac.jp](mailto:k-tanaka@cstf.kyushu-u.ac.jp)

**Composition profile in air.** Fig. S1 shows the scattering vector ( $q_z$ ) dependence of neutron reflectivity (NR) for the poly(2-methoxyethyl acrylate (PMEA)/deuterated poly(methyl methacrylate) (dPMMA) blend film with a weight ratio of 50/50 (wt/wt), or a volume ratio of 48/52 (v/v) in air. The solid curve in panel (a) was calculated on the basis of the model ( $b/V$ ) profile shown in panel (b), representing the best fit to the experimental data, shown by open circles. Table S1 summarizes the fitting parameters, where  $t$  and  $\sigma_i$  represent the total film thickness and Gaussian roughness, respectively. According to the mean field approximation, the composition profile of a miscible polymer mixture in the surface region is expressed by an exponential decay function.<sup>S1</sup> However, the experimental NR data obtained here could not be well fitted with such a function. Thus, the following ( $b/V$ ) profile was adopted;

$$(b/V)(z) = \sum_{i=1}^N \frac{(b/V)_i - (b/V)_{i+1}}{2} \left\{ 1 + \operatorname{erf} \left( \frac{z - z_i}{\sqrt{2}\sigma_i} \right) \right\} \quad (1)$$

where  $N$  and  $z$  are the number of layers and the depth, respectively. Assuming incompressibility of polymer chains, the average ( $b/V$ ) value for the PMEA/dPMMA blend should be  $4.20 \times 10^{-4} \text{ nm}^{-2}$ . While the ( $b/V$ )<sub>1</sub> and ( $b/V$ )<sub>3</sub> values were much smaller than the average ( $b/V$ ) value, the ( $b/V$ )<sub>2</sub> value was slightly larger than that value. This means that the PMEA component with a lower ( $b/V$ ) value was enriched both at the air and substrate interfaces.

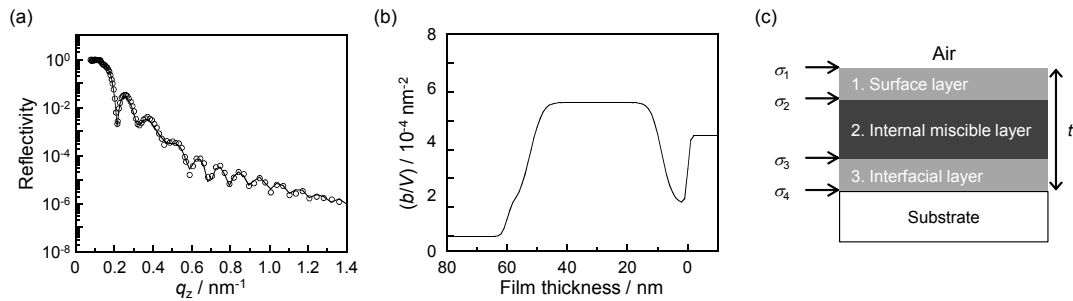

**Fig. S1.** (a) NR curve for the PMEA/dPMMA blend film in air. Open symbols depict the experimental data, and a solid line is the reflectivity calculated on the basis of (b) the ( $b/V$ ) profile of the blend film in air. (c) A schematic illustration of the three layer model used for fitting. Here,  $t$  and  $\sigma_i$  represent the total film thickness and Gaussian roughness, respectively.

**Table S1.** Parameters used to fit the experimental reflectivity for the PMEA/dPMMA blend film in air shown in Fig. S1(a).

| Film       | $(b/V) / 10^{-4} \text{ nm}^{-2}$ |           |           | $t / \text{nm}$ | $\sigma_i / \text{nm}$ |            |            |            |
|------------|-----------------------------------|-----------|-----------|-----------------|------------------------|------------|------------|------------|
|            | $(b/V)_1$                         | $(b/V)_2$ | $(b/V)_3$ |                 | $\sigma_1$             | $\sigma_2$ | $\sigma_3$ | $\sigma_4$ |
| PMEA/dPMMA | 1.10                              | 4.63      | 1.15      | 60.0            | 1.3                    | 3.3        | 2.9        | 0.7        |

**Contact angle measurements.** Movie S1 shows the behavior of air bubbles on the PMEA/PMMA blend films (a) before and (b) after being immersed in water for 10 hours.

**Fourier transform infrared (FT-IR) spectroscopy.** As a sample, a bulk PMEA film was prepared onto a NaCl substrate by a solvent casting method. The film was dried under vacuum for 12 hours at room temperature. FT-IR spectrum of PMEA was recorded in vacuum in a wavenumber region (400 - 4000  $\text{cm}^{-1}$ ) at the resolution of 1  $\text{cm}^{-1}$  on an FT/IR-620 Fourier transform infrared spectrometer (JASCO Corporation). The obtained spectrum was shown in Fig. S2.

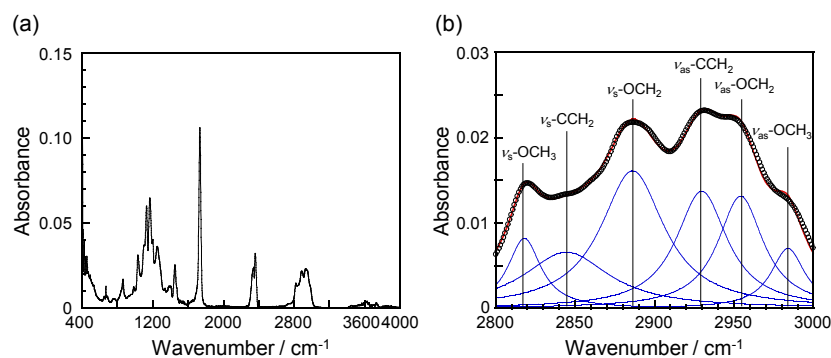

**Fig. S2.** (a) The FT-IR spectrum for a PMEA bulk film. (b) The enlarged spectrum of (a). While both red and blue curves are the curve-fitting results, the red one is the summation of the blue ones.

## Reference

S1. R. A. L. Jones and R. W. Richards, *Polymers at Surfaces and Interfaces*, Cambridge University Press, 1999.
